# Supplementary material
Source: HighWire-hosted journal article supplement (http://www.qdcxjkg.com/highwire/filestream/113606/field_highwire_adjunct_files/8/patient_info_-_tests_conducted_in_tb_clinics_-_urdu.pdf)
Supplement: patient_info_-_tests_conducted_in_tb_clinics_-_urdu.pdf [file patient_info_-_tests_conducted_in_tb_clinics_-_urdu.pdf]

## چھاتی کا ایکسرے

یہ اس بات کا معائنہ کرنے کے لئے عمل میں لایا جاتا ہے کہ کیا آپ کو پھیپھڑے کا تپ دق ہے۔ اس کو بعد میں یہ جاننے کے لئے دہرایا جاسکتا ہے کہ کیا علاج کام کر رہا ہے۔

## لعاب دہن/بلغم کا معائنہ

آپ کو لعاب کے نمونے فراہم کرنے کے لئے کہا جاسکتا ہے تاکہ اس بات کا معائنہ کیا جاسکے کہ کیا آپ کے پھیپھڑوں میں تپ دق ہے۔ معائنے کو بعد میں یہ جاننے کے لئے دہرایا جاسکتا ہے کہ کیا آپ کا علاج کام کر رہا ہے۔

## خون کے معائنے

خون کے ٹیسٹ یہ ظاہر کر سکتے ہیں کہ کیا آپ خون کی کمی کا شکار ہیں یا آپ کے جسم میں کوئی چھوت موجود ہے۔ علاج کے شروع ہونے کے بعد ان ٹیسٹوں کو دہرانے سے یہ پتہ چل سکتا ہے کہ کیا چھوت ختم ہو رہی ہے۔

دیگر معائنے ہمیں یہ بتانے کے لئے عمل میں لائے جاتے ہیں کہ آپ کا جگر اور گردے علاج سے پہلے اور علاج کے دوران کیسے کام کر رہے ہیں۔ یہ ٹیسٹ اہم ہیں کیونکہ آپ کی بعض ادویات آپ کے جگر اور گردوں کی کارکردگی پر اثر انداز ہو سکتی ہیں۔

تپ دق (TB)  
کلینکوں میں گئے  
جانے والے معائنے

## مزید معلومات

ایچ آئی وی HIV

NAHIP: [www.nahip.org.uk](http://www.nahip.org.uk)

Do It Right:

[www.doitright.uk.com](http://www.doitright.uk.com)

THT: [www.tht.org.uk](http://www.tht.org.uk)

تپ دق TB

NKS TB:

[www.hpa.org.uk/tbknowledge](http://www.hpa.org.uk/tbknowledge)

TB Alert: [www.tbalert.org](http://www.tbalert.org)

دیگر مفید سائٹیں

NHS choices: [www.nhs.uk](http://www.nhs.uk)

Health Protection Agency:

[www.hpa.org.uk](http://www.hpa.org.uk)

## رازداری

آپ کے تمام معائنون کے نتائج کورازداری میں رکھا جائے گا اور معلومات کا صرف علاج معالجے سے متعلق ان پیشہ ور افراد کے ساتھ ہی تبادلہ کیا جائے گا جو آپ کے علاج میں براہ راست ملوث ہیں۔

## دیگر چھوتوں کے لئے معائنے

ہم آپ کا ہیپاٹائٹس بی اور ہیپاٹائٹس سی کی چھوتوں کے لئے بھی ٹیسٹ کر سکتے ہیں۔ یہ چھوتیں آپ کے جگر کے کام کرنے کے طریقے کو تبدیل کر سکتی ہیں اور آپ کے تپ دق کے علاج پر بھی اثر انداز ہو سکتی ہیں۔ اگر آپ کا ٹیسٹ مثبت ہے تو آپ کو ایک خصوصی ماہرین کی ٹیم کی طرف بھیجا جاسکتا ہے۔

## دیگر چھوتوں کے لئے ٹیسٹ

ہم تپ دق کلینک میں حاضر ہونے والے ہر شخص کے لئے ایک ایچ آئی وی (HIV) ٹیسٹ کی پیشکش کرتے ہیں۔ HIV جسم کے مدافعتی نظام پر اثر انداز ہوتا ہے، چنانچہ تپ دق زیادہ آسانی سے اپنے پاؤں جما سکتا ہے۔ HIV کے لئے ایک اچھا علاج موجود ہے جو آپ کی صحت بہتر بنا سکتا ہے۔
